# Supplementary material for: Tailoring the structure of polysulfone nanocomposite membranes by incorporating iron oxide doped aluminium oxide for excellent separation performance and antifouling property
Source: Royal Society of Chemistry journal article supplement (doi:10.1039/d1ew00936b), 2022-01-01
Supplement: d1ew00936b1.pdf [file d1ew00936b1.pdf]

1           **Tailoring the structure of Polysulfone nanocomposite membranes by**  
2           **incorporating Iron oxide doped Aluminium Oxide for excellent separation**  
3                           **performance and antifouling property**

4                           Prajwal Sherugar<sup>a</sup>, S. Déon<sup>b</sup>, K.K. Nagaraja<sup>c</sup>, Mahesh Padaki<sup>\*a</sup>,

5           <sup>a</sup> Centre for Nano and Material Sciences, Jain University, Jain Global Campus, Kanakapura,  
6                           Ramanagaram, Bangalore 562112, India.

7           <sup>b</sup> Institut UTINAM (UMR CNRS 6213), Université de Bourgogne-Franche-Comté, 16 Route de  
8                           Gray, 25030 Besançon Cedex, France

9           <sup>c</sup> Department of Physics, Manipal Institute of Technology, Manipal, Manipal Academy of Higher  
10                           Education, Manipal 576 104, India

11           \*Corresponding author Email: [sp.mahesh@jainuniversity.ac.in](mailto:sp.mahesh@jainuniversity.ac.in) Mobile No.: 9538414994

12

13

14

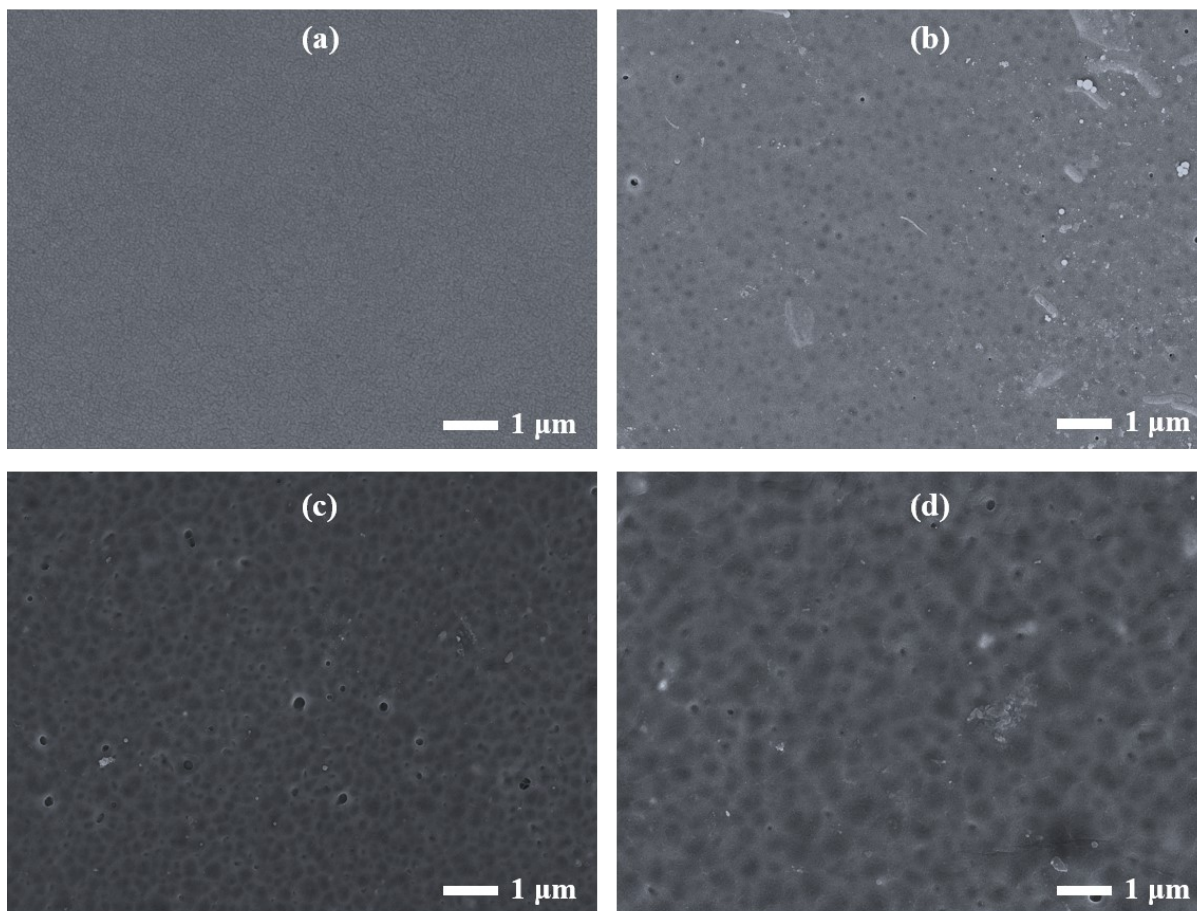

15

16

**Figure S1:** Surface FESEM images of (a)  $F_0$  (b)  $F_1$  (c)  $F_2$  (d)  $F_3$

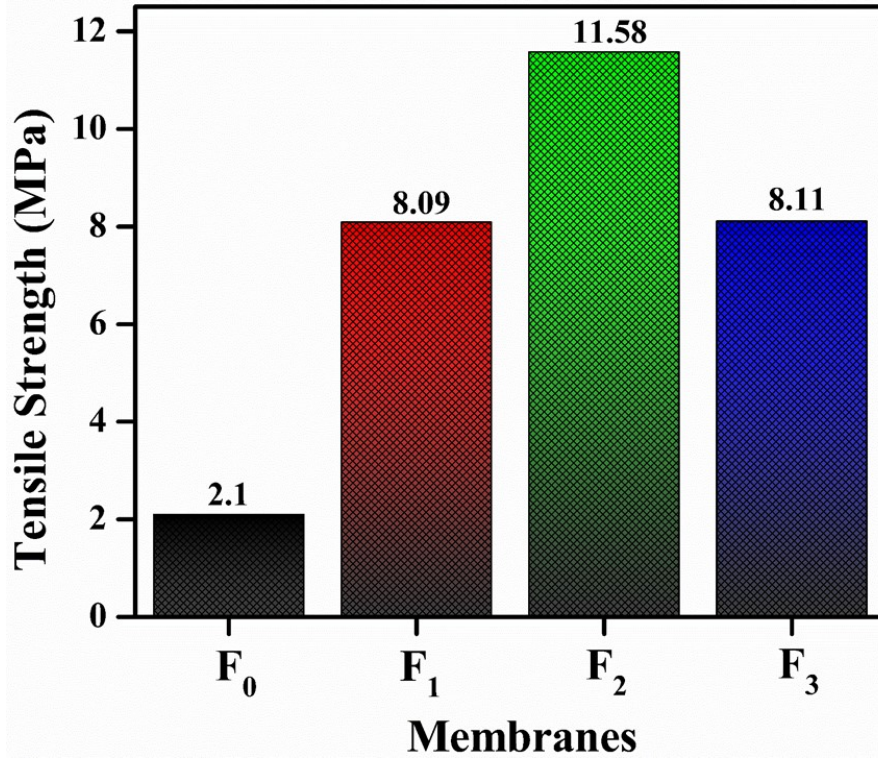

17

18

**Figure S2:** Tensile Strength of (a) F<sub>0</sub> (b) F<sub>1</sub> (c) F<sub>2</sub> (d) F<sub>3</sub>

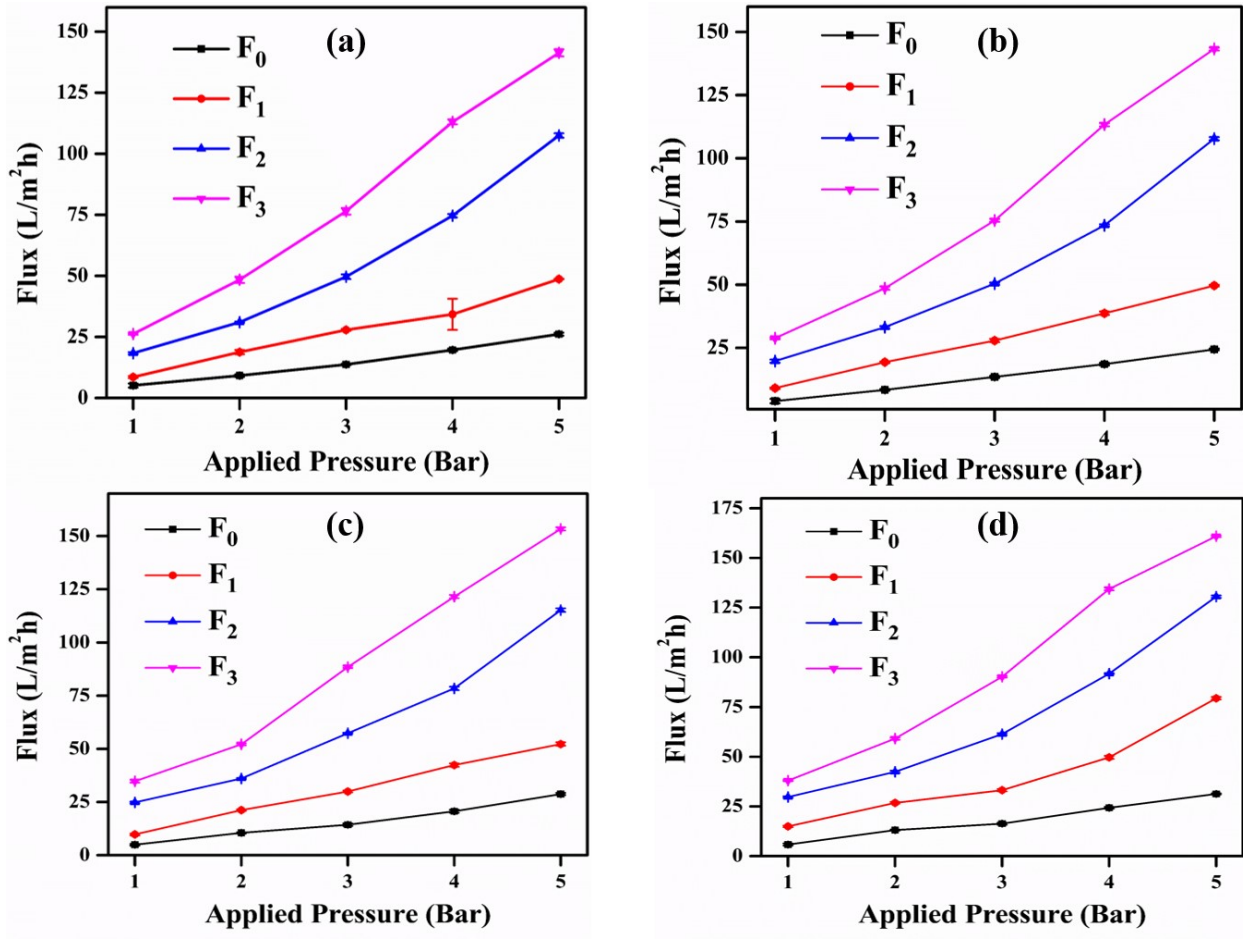

Figure S3. Permeate flux of (a) lead (b) Cadmium, (c) Mercury and (d) Fluoride

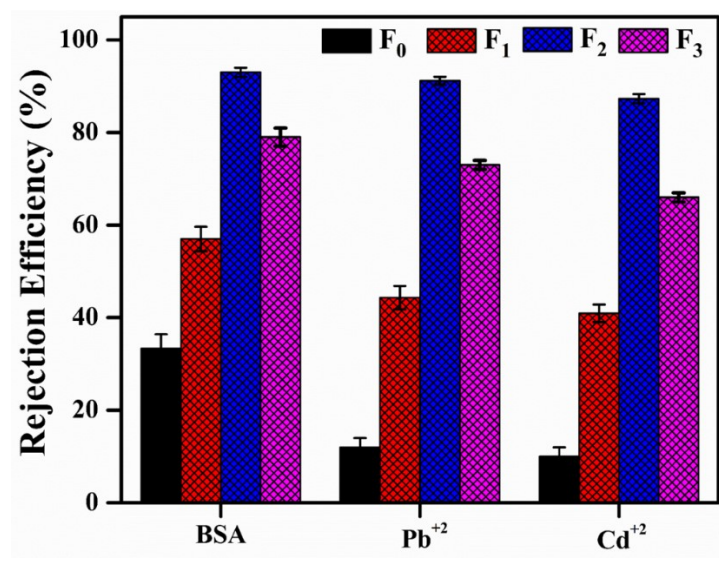

Figure S4: Rejection efficiency of the fabricated membranes during antifouling study.

24 **Table S1: Compositions of the fabricated membranes**

| <b>Membranes</b> | <b>PSf (g)</b> | <b>Fe: Al<sub>2</sub>O<sub>3</sub>(wt%)</b> | <b>NMP (mL)</b> |
|------------------|----------------|---------------------------------------------|-----------------|
| F <sub>0</sub>   | 4.0            | 0                                           | 16              |
| F <sub>1</sub>   | 3.9            | 0.625                                       | 16              |
| F <sub>2</sub>   | 3.8            | 1.25                                        | 16              |
| F <sub>3</sub>   | 3.7            | 1.875                                       | 16              |

25

26

27 **Table S2: Water Uptake and Porosity of the fabricated membranes**

28

| <b>Membranes</b> | <b>Water Uptake (%)</b> | <b>Porosity (%)</b> |
|------------------|-------------------------|---------------------|
| F <sub>0</sub>   | 11.2±2                  | 36.1±2              |
| F <sub>1</sub>   | 20.2±1                  | 44.3±1              |
| F <sub>2</sub>   | 26.5±2                  | 54.6±1              |
| F <sub>3</sub>   | 31.3±1.5                | 79.4±2              |

29

30

31

32

33 **Table S3:** Antifouling properties of fabricated Fe:Al<sub>2</sub>O<sub>3</sub>/PSf nanocomposite membranes  
 34 compared with of various other nanocomposite membranes

| Type of nanocomposite membranes           | Nanoparticles dosage (wt%) | FRR (%)   | Total Fouling (%) | Reference        |
|-------------------------------------------|----------------------------|-----------|-------------------|------------------|
| Cellulose Acetate/ZrO <sub>2</sub>        | 7                          | 71        | 2.58              | 1                |
| PVDF/ZnO                                  | 1                          | 50        | -                 | 2                |
| Silica-PVP                                | 1                          | 85        | 35                | 3                |
| Titania NPs/PES                           | 1                          | 75        | 7.29              | 4                |
| PVDF- MnO <sub>2</sub>                    | 2                          | 93.5      | -                 | 5                |
| GO/PPSU                                   | 2                          | 88±4.2    | 34                | 6                |
| Pluronic F127/PEI                         | 3                          | 73.3      | 50                | 7                |
| MXene/PSf                                 | 500mg                      | 76        | 84                | 8                |
| Boron nitride/PSf                         | 2                          | 82        | -                 | 9                |
| Isocyanate treated GO/PSf                 | 0.05                       | 40        | -                 | 10               |
| SiO <sub>2</sub> -GO/PSf                  | 0.3                        | 72        | -                 | 11               |
| <b>Fe:Al<sub>2</sub>O<sub>3</sub>/PSf</b> | <b>1.25 wt%</b>            | <b>89</b> | <b>37.65</b>      | <b>This work</b> |

35

36

37

38

## 39 Reference

- 40 1. G. Arthanareeswaran and P. Thanikaivelan, Fabrication of cellulose acetate–zirconia  
41 hybrid membranes for ultrafiltration applications: performance, structure and fouling  
42 analysis, *Separation and Purification Technology*, 2010, **74**, 230-235.
- 43 2. T.-F. Jiang, Z.-H. Lv, X.-Y. Cui and Y.-H. Wang, Analysis of malachite green, gentian  
44 violet and their leuco metabolites in catfish and carp by micellar electrokinetic capillary  
45 chromatography, *Journal of Food & Drug Analysis*, 2012, **20**, 94-100.
- 46 3. M. Sun, Y. Su, C. Mu and Z. Jiang, Improved antifouling property of PES ultrafiltration  
47 membranes using additive of silica– PVP nanocomposite, *Industrial & Engineering*  
48 *Chemistry Research*, 2010, **49**, 790-796.
- 49 4. Z.-X. Low, Z. Wang, S. Leong, A. Razmjou, L. F. Dumée, X. Zhang and H. Wang,  
50 Enhancement of the antifouling properties and filtration performance of poly (ethersulfone)  
51 ultrafiltration membranes by incorporation of nanoporous titania nanoparticles, *Industrial*  
52 *& Engineering Chemistry Research*, 2015, **54**, 11188-11198.
- 53 5. M. S. S. A. Saraswathi, D. Rana, K. Divya, S. Alwarappan and A. Nagendran, Fabrication  
54 of anti-fouling PVDF nanocomposite membranes using manganese dioxide nanospheres  
55 with tailored morphology, hydrophilicity and permeation, *New Journal of Chemistry*, 2018,  
56 **42**, 15803-15810.
- 57 6. A. K. Shukla, J. Alam, M. Alhoshan, L. A. Dass and M. R. Muthumareeswaran,  
58 Development of a nanocomposite ultrafiltration membrane based on polyphenylsulfone  
59 blended with graphene oxide, *Sci Rep*, 2017, **7**, 41976.
- 60 7. P. Kanagaraj, S. Neelakandan, A. Nagendran, D. Rana, T. Matsuura and M. Shalini,  
61 Removal of BSA and HA contaminants from aqueous solution using amphiphilic triblock

- 62 copolymer modified poly (ether imide) UF membrane and their fouling behaviors,  
63 *Industrial & Engineering Chemistry Research*, 2015, **54**, 11628-11634.
- 64 8. Z. Shen, W. Chen, H. Xu, W. Yang, Q. Kong, A. Wang, M. Ding and J. Shang, Fabrication  
65 of a novel antifouling polysulfone membrane with in situ embedment of mxene nanosheets,  
66 *International journal of environmental research and public health*, 2019, **16**, 4659.
- 67 9. C. Tang, A. Zulhairun, T. Wong, S. Alireza, M. Marzuki and A. Ismail, Water transport  
68 properties of boron nitride nanosheets mixed matrix membranes for humic acid removal,  
69 *Heliyon*, 2019, **5**, e01142.
- 70 10. H. Zhao, L. Wu, Z. Zhou, L. Zhang and H. Chen, Improving the antifouling property of  
71 polysulfone ultrafiltration membrane by incorporation of isocyanate-treated graphene  
72 oxide, *Physical chemistry chemical physics*, 2013, **15**, 9084-9092.
- 73 11. H. Wu, B. Tang and P. Wu, Development of novel SiO<sub>2</sub>-GO nanohybrid/polysulfone  
74 membrane with enhanced performance, *Journal of Membrane Science*, 2014, **451**, 94-102.
- 75
